# Supplementary material for: Immunohistochemistry scoring of breast tumor tissue microarrays: A comparison study across three software applications
Source: PubMed Central journal article supplement — J Pathol Inform. 2022 Jun 28;13:100118. doi: 10.1016/j.jpi.2022.100118 (PMC9577037; doi:10.1016/j.jpi.2022.100118), 2022-06-28
Supplement: mmc1.pdf [file mmc1.pdf]

**Supplementary 1.** Core information about the four tissue microarrays (TMAs) stained for estrogen receptor (ER), progesterone receptor (PR), human epidermal growth factor receptor 2 (HER2), epithelial growth factor receptor (EGFR), and cytokeratin 5/6 (CK5/6).

|                                                                       | ER   | PR   | HER2 | EGFR | CK5/6 |
|-----------------------------------------------------------------------|------|------|------|------|-------|
| Total cores across the 4 TMAs, <i>n</i>                               | 1197 | 1197 | 1197 | 1197 | 1197  |
| Total women across the 4 TMAs, <i>n</i>                               | 385  | 385  | 385  | 385  | 385   |
| Cores with no tumor after pathologist's assessment, <i>n</i>          | 167  | 157  | 151  | 131  | 128   |
| Cores determined as missing or not evaluable by pathologist, <i>n</i> | 98   | 109  | 119  | 105  | 146   |
| Cores evaluated by pathologist, <i>n</i>                              | 932  | 931  | 927  | 961  | 923   |
| Resultant women in this study, <i>n</i>                               | 358  | 359  | 357  | 361  | 359   |

**Supplementary 2.** Twelve cores were chosen to train tissue segmentation and establish immunohistochemistry thresholds for each clinical marker. A board-certified pathologist scored each of these markers as negative (<1%), low positive (1-10%), and positive (>10%).

**A. Estrogen receptor.**

| <b>Negative<br/>(&lt;1%)</b>                                                        | <b>Low Positive<br/>(1-10%)</b>                                                      | <b>Positive<br/>(&gt;10%)</b>                                                         |
|-------------------------------------------------------------------------------------|--------------------------------------------------------------------------------------|---------------------------------------------------------------------------------------|
| 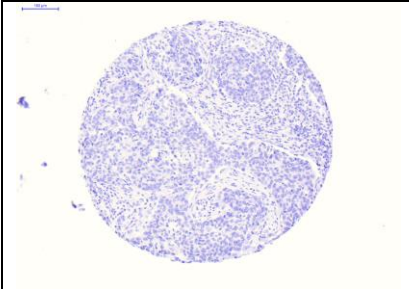   |    |    |
|   |   |   |
|  |  |  |
|  |  |  |

**B. Progesterone receptor.**

| <b>Negative<br/>(&lt;1%)</b>                                                        | <b>Low Positive<br/>(1-10%)</b>                                                     | <b>Positive<br/>(&gt;10%)</b>                                                         |
|-------------------------------------------------------------------------------------|-------------------------------------------------------------------------------------|---------------------------------------------------------------------------------------|
| 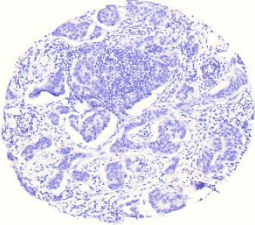   |    |    |
|    |    |    |
|   |   |   |
|  |  |  |

C. Human epidermal growth factor receptor 2.

| Negative (<1%)                                                                      | Low Positive (1-10%)                                                                | Positive (>10%)                                                                       |
|-------------------------------------------------------------------------------------|-------------------------------------------------------------------------------------|---------------------------------------------------------------------------------------|
| 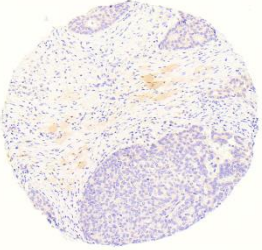   |    |    |
|    |    |    |
|  |  |   |
|  |  |  |

D. Epithelial growth factor receptor.

| Negative (<1%)                                                                      | Low Positive (1-10%)                                                                 | Positive (>10%)                                                                       |
|-------------------------------------------------------------------------------------|--------------------------------------------------------------------------------------|---------------------------------------------------------------------------------------|
| 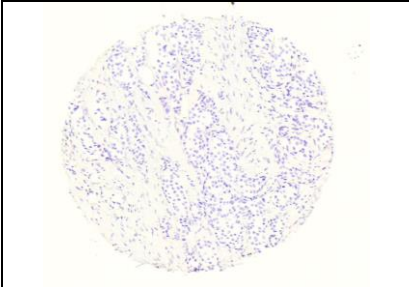   |    |    |
|    |    |    |
|   |   |   |
|  |  |  |

E. Cytokeratin 5/6.

| <b>Negative<br/>(&lt;1%)</b>                                                        | <b>Low Positive<br/>(1-10%)</b>                                                      | <b>Positive<br/>(&gt;10%)</b>                                                         |
|-------------------------------------------------------------------------------------|--------------------------------------------------------------------------------------|---------------------------------------------------------------------------------------|
| 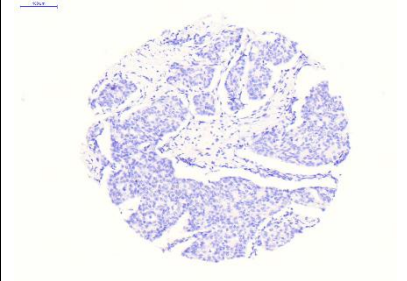   |    |    |
|    |    |    |
|   |   |   |
|  |  |  |

**Supplementary 3.** Parameters used in training the immunohistochemistry thresholds for each software.

|                                                 | <b>Definiens<br/>(.mrxs)</b> | <b>inForm<br/>(.qptiff)</b> | <b>QuPath<br/>(.mrxs)</b> | <b>QuPath<br/>(.qptiff)</b> |
|-------------------------------------------------|------------------------------|-----------------------------|---------------------------|-----------------------------|
| <b>Estrogen receptor</b>                        |                              |                             |                           |                             |
| Training TMA                                    | 359                          | 359                         | 359                       | 359                         |
| IHC minimum detection value                     | 0.20                         | 0.10                        | 0.20                      | 0.20                        |
| H&E threshold                                   | 0.10                         | 0.22                        | 0.10                      | 0.10                        |
| <b>Progesterone receptor</b>                    |                              |                             |                           |                             |
| Training TMA                                    | 359                          | 359                         | 359                       | 359                         |
| IHC minimum detection value                     | 0.15                         | 0.12                        | 0.15                      | 0.15                        |
| H&E threshold                                   | 0.07                         | 0.28                        | 0.10                      | 0.08                        |
| <b>Human epidermal growth factor receptor 2</b> |                              |                             |                           |                             |
| Training TMA                                    | 359                          | 359                         | 359                       | 359                         |
| IHC minimum detection value                     | 0.15                         | 0.09                        | 0.15                      | 0.15                        |
| H&E threshold                                   | 0.07                         | 0.16                        | 0.07                      | 0.05                        |
| <b>Epithelial growth factor receptor</b>        |                              |                             |                           |                             |
| Training TMA                                    | 359                          | 359                         | 359                       | 359                         |
| IHC minimum detection value                     | 0.08                         | 0.06                        | 0.12                      | 0.12                        |
| H&E threshold                                   | 0.04                         | 0.20                        | 0.07                      | 0.05                        |
| <b>Cytokeratin 5/6</b>                          |                              |                             |                           |                             |
| Training TMA                                    | 359                          | 359                         | 359                       | 359                         |
| IHC minimum detection value                     | 0.08                         | 0.06                        | 0.06                      | 0.06                        |
| H&E threshold                                   | 0.07                         | 0.16                        | 0.07                      | 0.07                        |

**Supplementary 4A.** Pair-wise correlation of the number of detected tumor cells using Spearman's  $\rho$ .

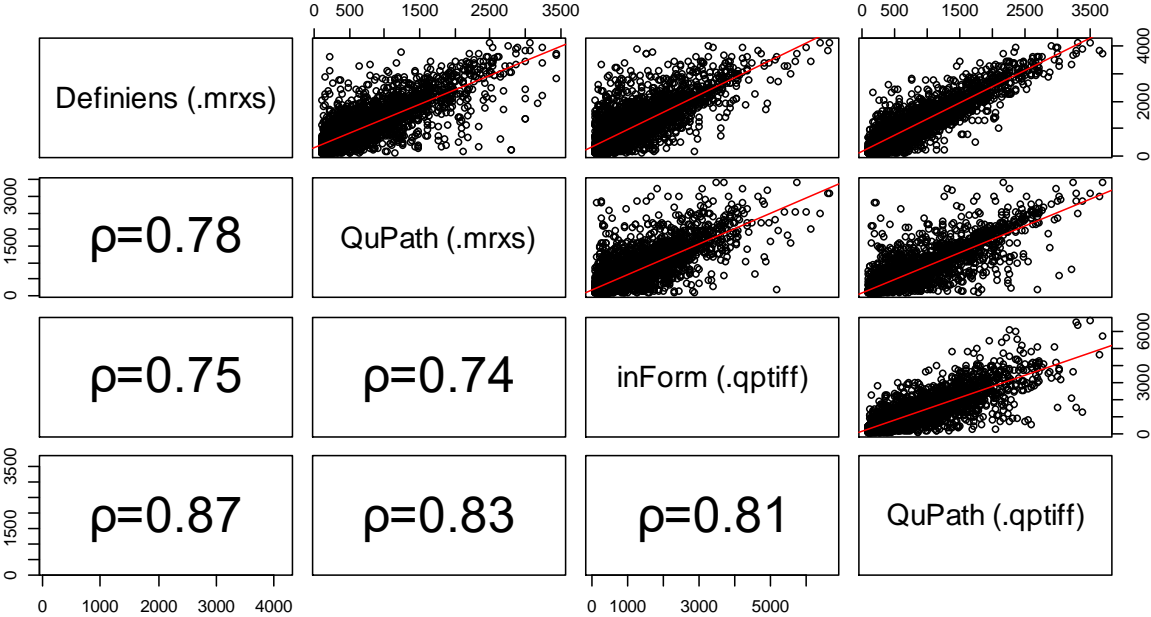



**Supplementary 4B.** Pair-wise correlation of the number of detected stromal cells using Spearman's  $\rho$ .

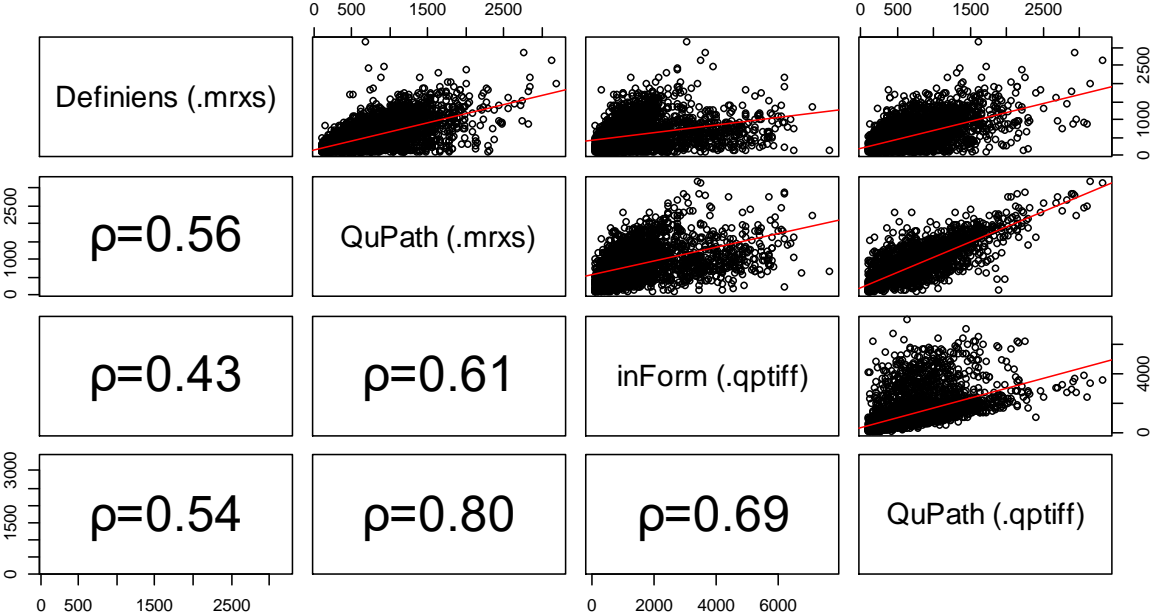

**Supplementary 5.** Intra-rater reliability of each software to classify tumor or stromal cells across 2 to 15 cores on 5 tissue microarrays pertaining to each woman, assessed using intraclass correlation (ICC).

|                                              | <b>ICC (95% confidence interval)</b> |
|----------------------------------------------|--------------------------------------|
| <b>Number of cells classified as tumor</b>   |                                      |
| Definiens (.mrxs)                            | 0.92 (0.91-0.93)                     |
| QuPath (.mrxs)                               | 0.94 (0.93-0.95)                     |
| inForm (.qptiff)                             | 0.92 (0.91-0.94)                     |
| QuPath (.qptiff)                             | 0.91 (0.89-0.92)                     |
| <b>Number of cells classified as stromal</b> |                                      |
| Definiens (.mrxs)                            | 0.80 (0.75-0.83)                     |
| QuPath (.mrxs)                               | 0.94 (0.93-0.95)                     |
| inForm (.qptiff)                             | 0.79 (0.75-0.83)                     |
| QuPath (.qptiff)                             | 0.91 (0.90-0.92)                     |

**Supplementary 6.** Spearman's correlations between manual and software-derived scores for each marker at case level whereby each woman is represented by 1-3 cores. For manual assessment, each case was represented by the highest ordinal category across its cores (negative, low positive, and positive). For software applications, a weighted average percent positive was calculated to represent each case.

### A. Estrogen receptor.

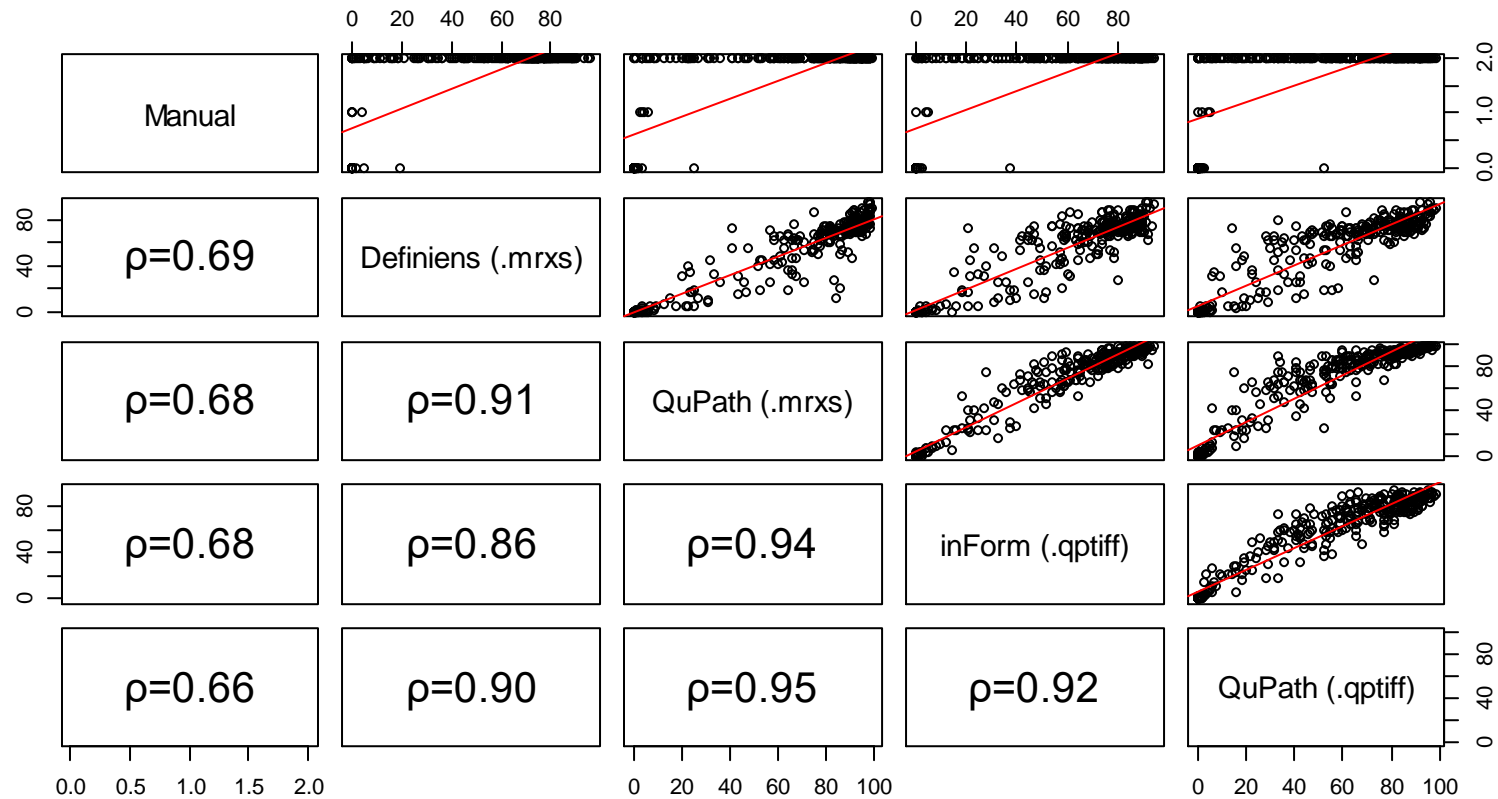

## B. Progesterone receptor.

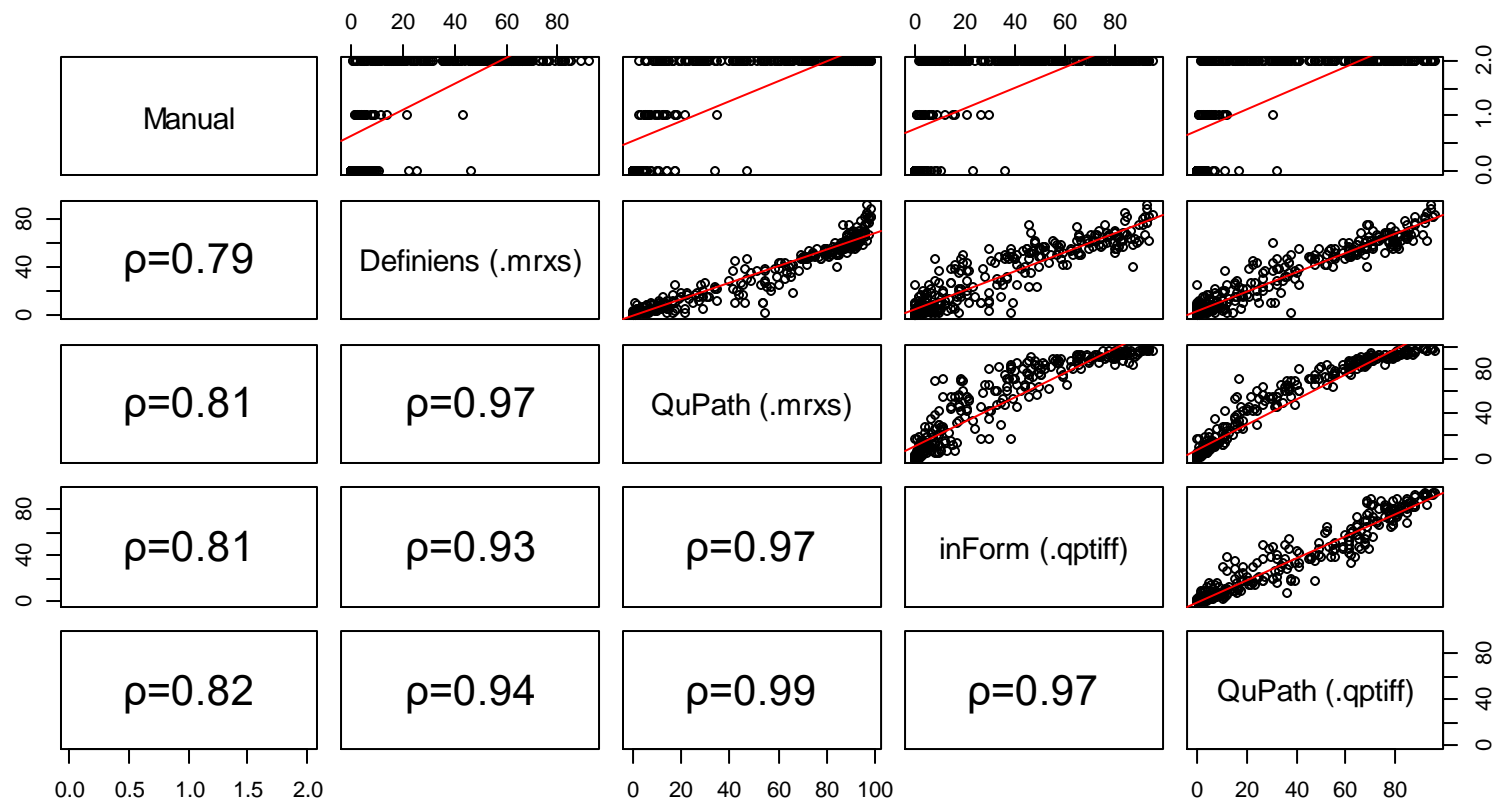

### C. Human epidermal growth factor receptor 2.

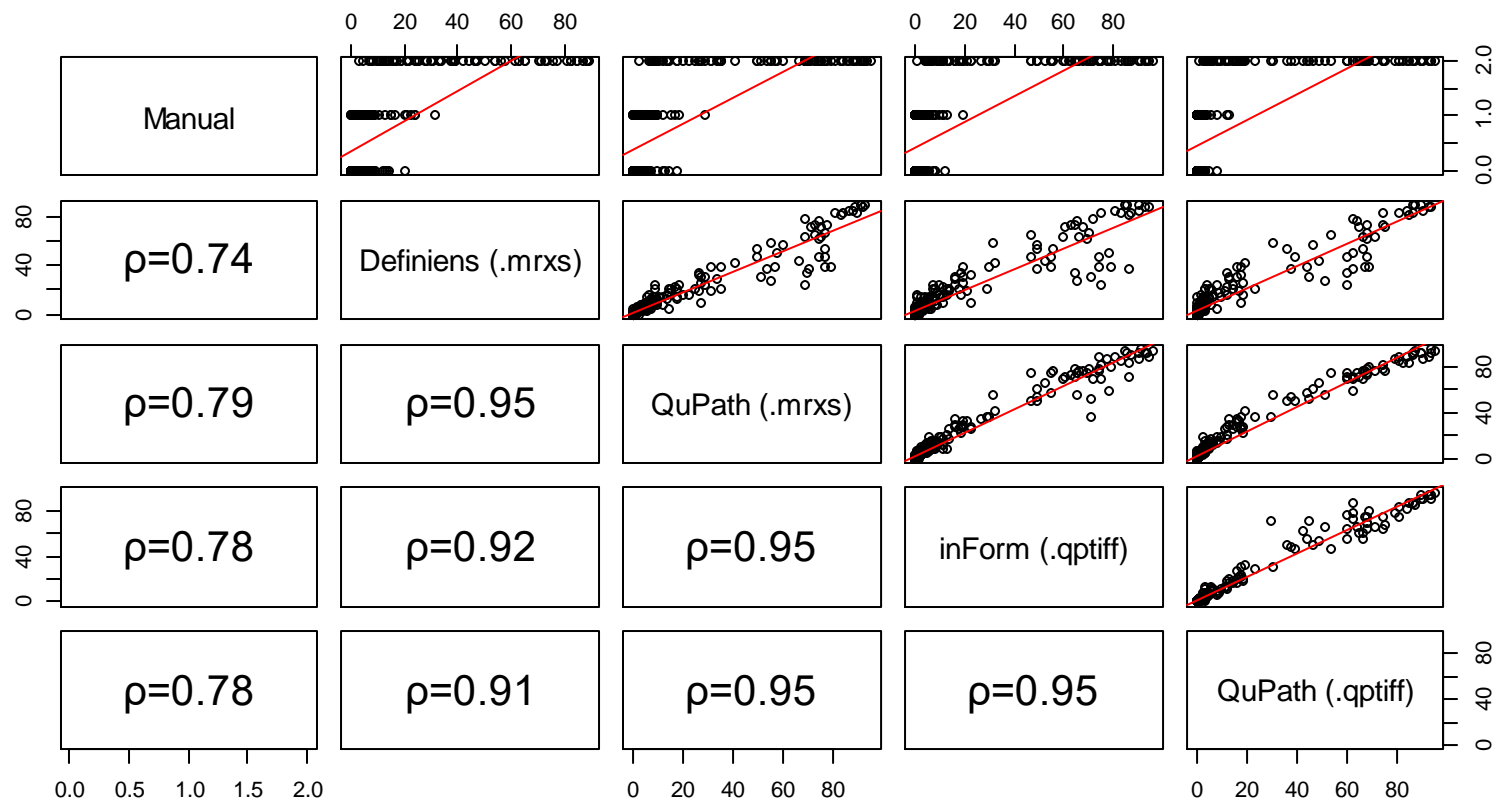

### D. Epidermal growth factor receptor.

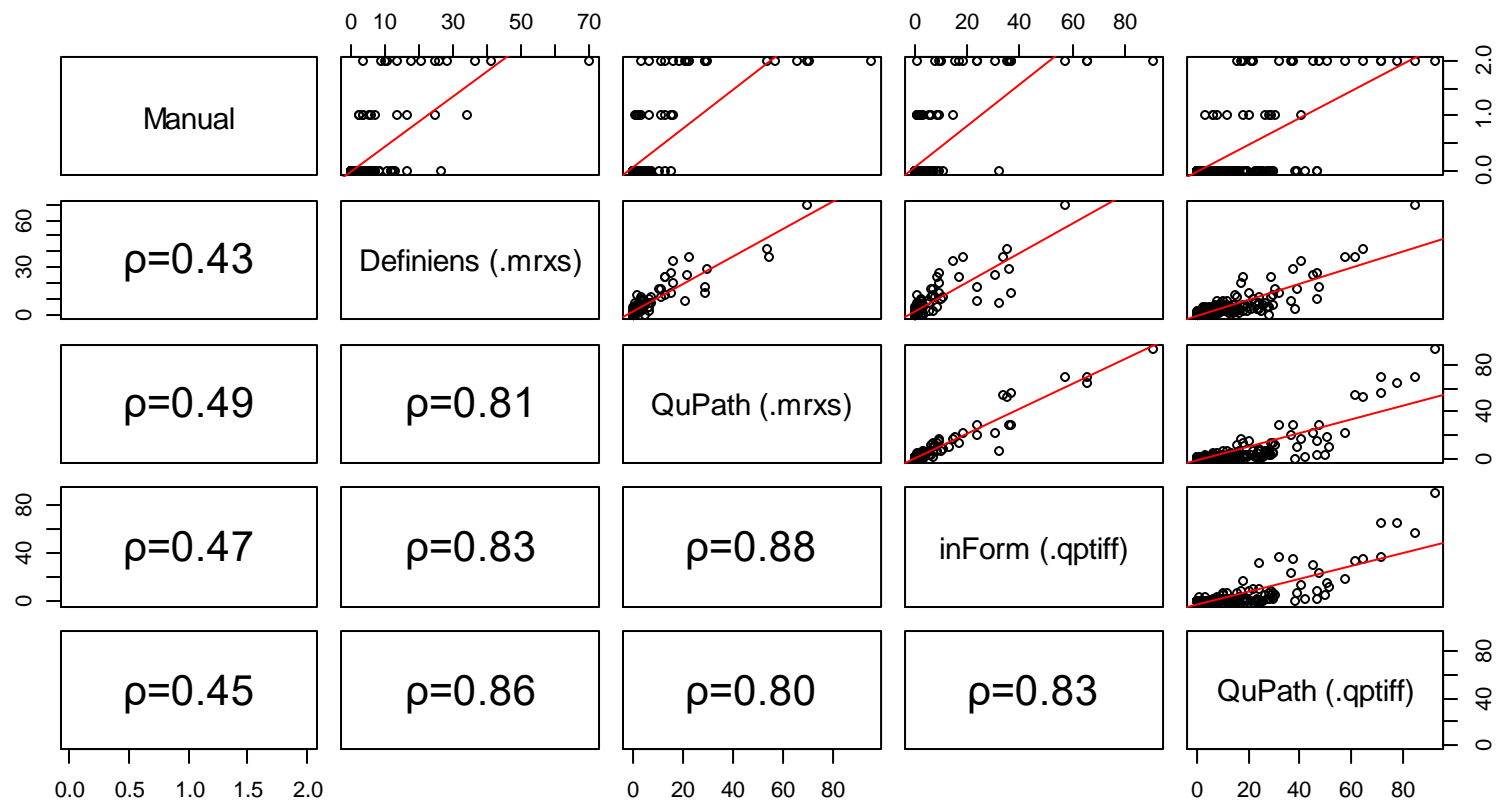

## E. Cytokeratin 5/6.

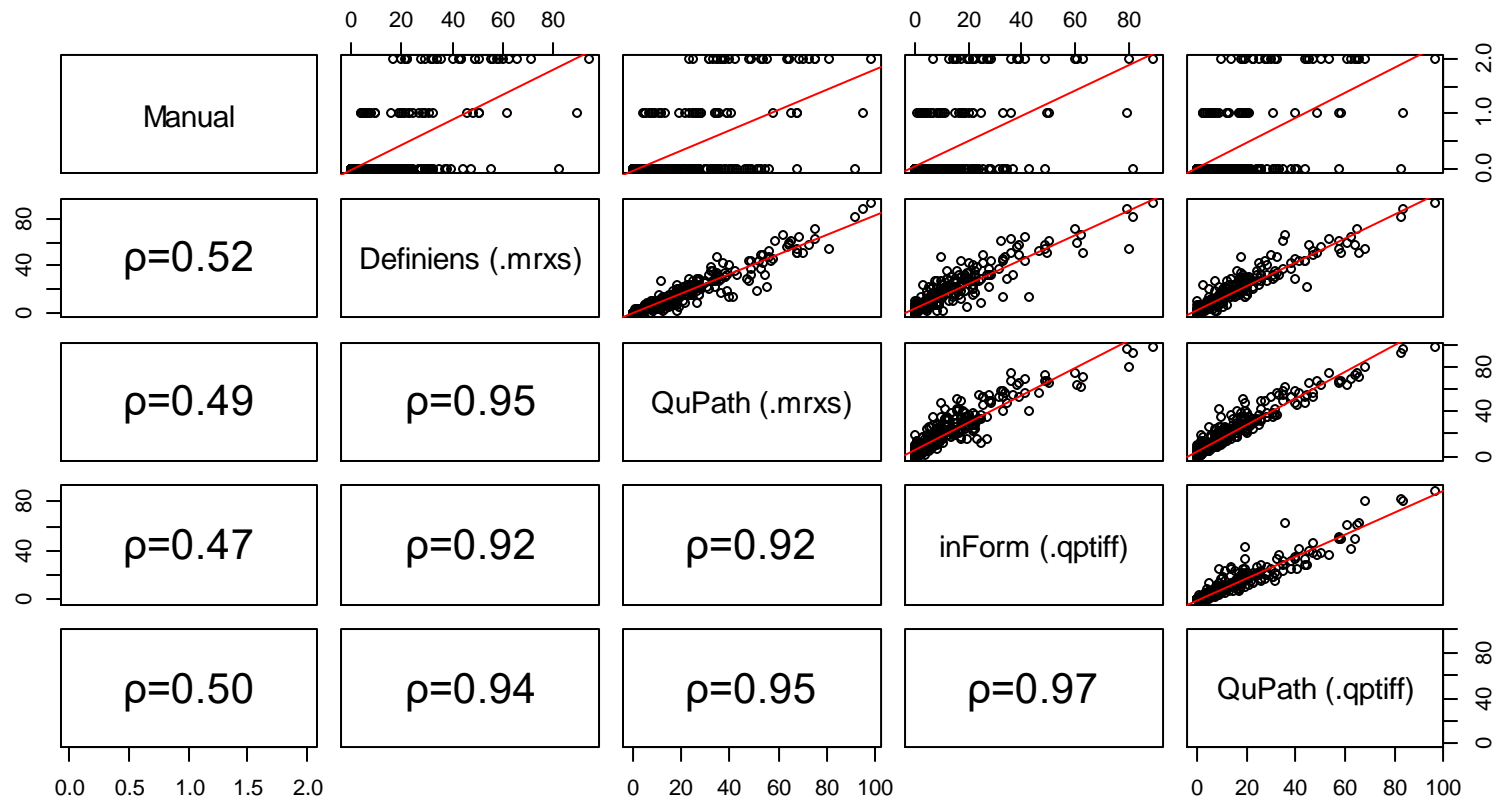

**Supplementary 7.** Case-level percentage agreements between manual and software-derived scores for **A.** epidermal growth factor receptor and **B.** cytokeratin 5/6. For manual assessment, each case was represented by the highest ordinal category across its cores and dichotomized into negative/low positive  $\leq 10\%$  or positive ( $>10\%$ ). For software applications, the weighted average percent positive was calculated to represent each case and also dichotomized into negative/low positive  $\leq 10\%$  or positive ( $>10\%$ ).

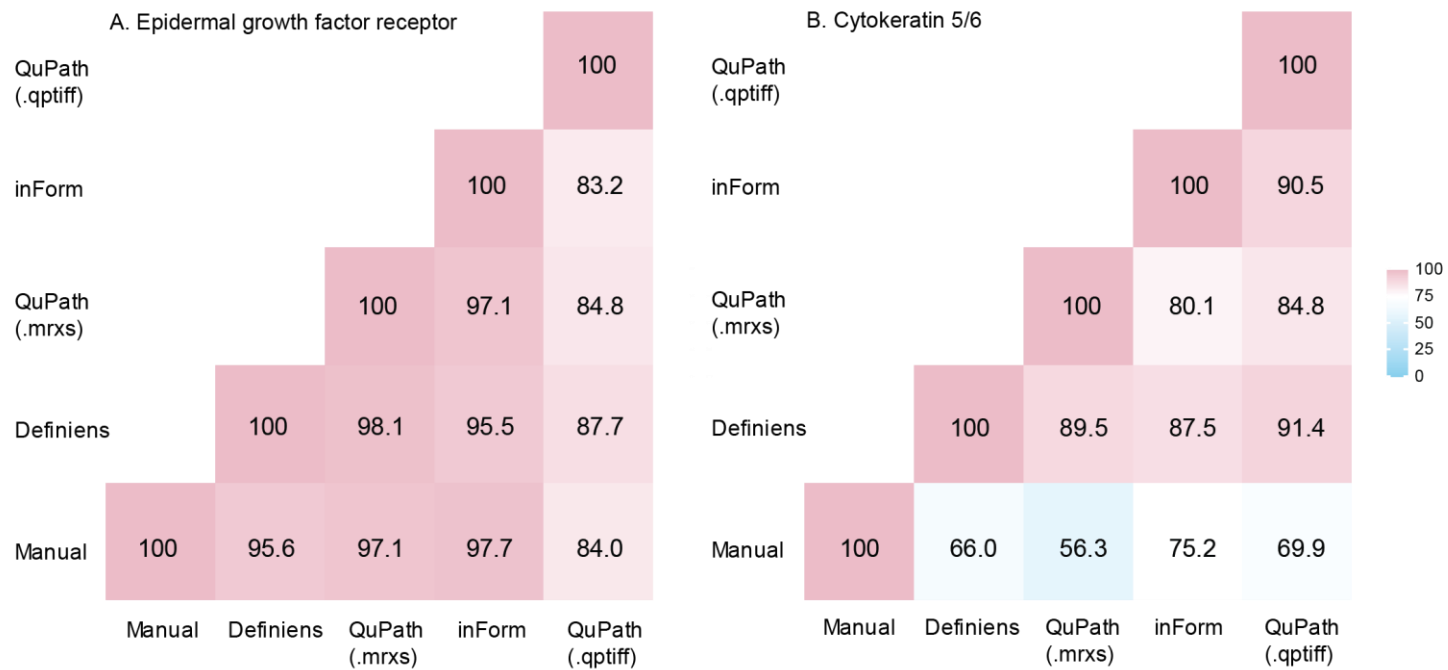



**Supplementary 8.** Software ranking based on highest p or percentage agreement when benchmarked against manual scores.

|                                                                                                                 | Definiens | QuPath (.mrxs) | inForm | QuPath (.qptiff) | Overall Highest Ranked Software |
|-----------------------------------------------------------------------------------------------------------------|-----------|----------------|--------|------------------|---------------------------------|
| Core-level comparison—Spearman's $\rho$ (Figure 3)                                                              |           |                |        |                  |                                 |
| ER                                                                                                              | 3         | 1              | 1      | 2                |                                 |
| PR                                                                                                              | 3         | 1              | 2      | 1                |                                 |
| HER2                                                                                                            | 3         | 1              | 2      | 1                |                                 |
| EGFR                                                                                                            | 3         | 1              | 1      | 2                |                                 |
| CK5/6                                                                                                           | 1         | 3              | 4      | 2                |                                 |
|                                                                                                                 |           |                |        |                  | QuPath                          |
| Case-level comparison—Spearman's $\rho$ (Supplementary 6)                                                       |           |                |        |                  |                                 |
| ER                                                                                                              | 1         | 2              | 2      | 3                |                                 |
| PR                                                                                                              | 3         | 2              | 2      | 1                |                                 |
| HER2                                                                                                            | 3         | 1              | 2      | 2                |                                 |
| EGFR                                                                                                            | 4         | 1              | 2      | 3                |                                 |
| CK5/6                                                                                                           | 1         | 3              | 4      | 2                |                                 |
|                                                                                                                 |           |                |        |                  | QuPath                          |
| Case-level comparison—percentage agreements (Figure 4 for ER, PR and HER 2; Supplementary 7 for EGFR and CK5/6) |           |                |        |                  |                                 |
| ER                                                                                                              | 2         | 3              | 1      | 3                |                                 |
| PR                                                                                                              | 4         | 2              | 3      | 1                |                                 |
| HER2                                                                                                            | 4         | 2              | 3      | 1                |                                 |
| EGFR                                                                                                            | 3         | 2              | 1      | 4                |                                 |
| CK5/6                                                                                                           | 3         | 4              | 1      | 2                |                                 |
|                                                                                                                 |           |                |        |                  | inForm®                         |
| Case-level comparison—area under receiver-operator characteristics curves (Figure 5)                            |           |                |        |                  |                                 |
| ER                                                                                                              | 2         | 1              | 1      | 2                |                                 |
| PR                                                                                                              | 3         | 1              | 2      | 1                |                                 |
| HER2                                                                                                            | 2         | 1              | 1      | 1                |                                 |
| EGFR                                                                                                            | 2         | 1              | 2      | 3                |                                 |
| CK5/6                                                                                                           | 1         | 2              | 3      | 2                |                                 |
|                                                                                                                 |           |                |        |                  | QuPath                          |

Estrogen receptor, ER; progesterone receptor, PR; human epidermal growth factor receptor 2, HER2; epithelial growth factor receptor, EGFR; cytokeratin 5/6, CK5/6.
